# Supplementary figures and images for: Inhibition of alpha-synuclein seeded fibril formation and toxicity by herbal medicinal extracts
Source: PubMed Central journal article supplement (PMC7076823; doi:10.1186/s12906-020-2849-1), 2020-03-06

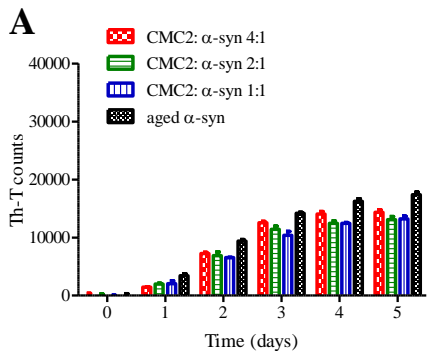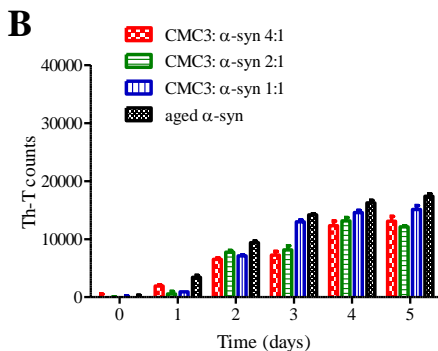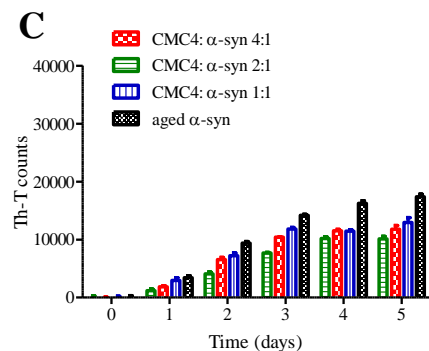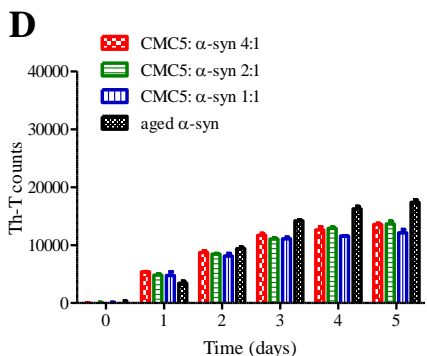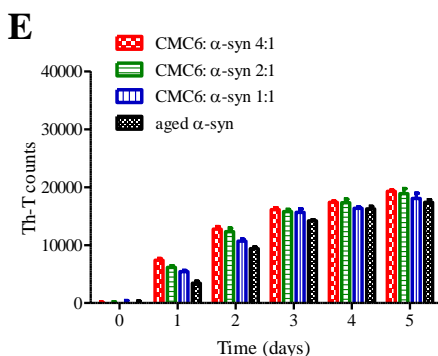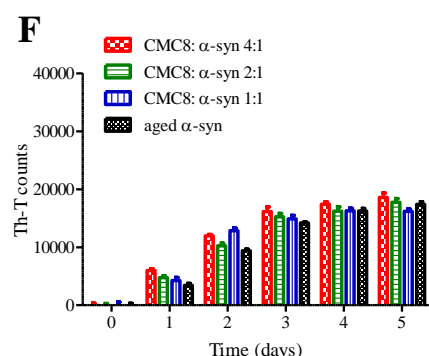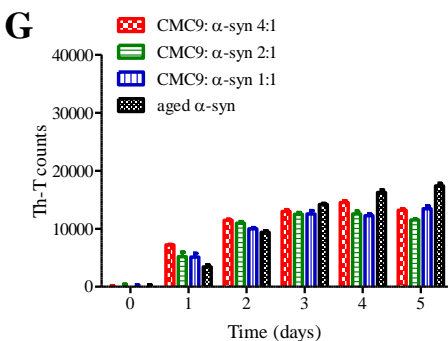

Additional file 1

Supplement: 12906_2020_2849_MOESM1_ESM.pdf [file 12906_2020_2849_MOESM1_ESM.pdf]

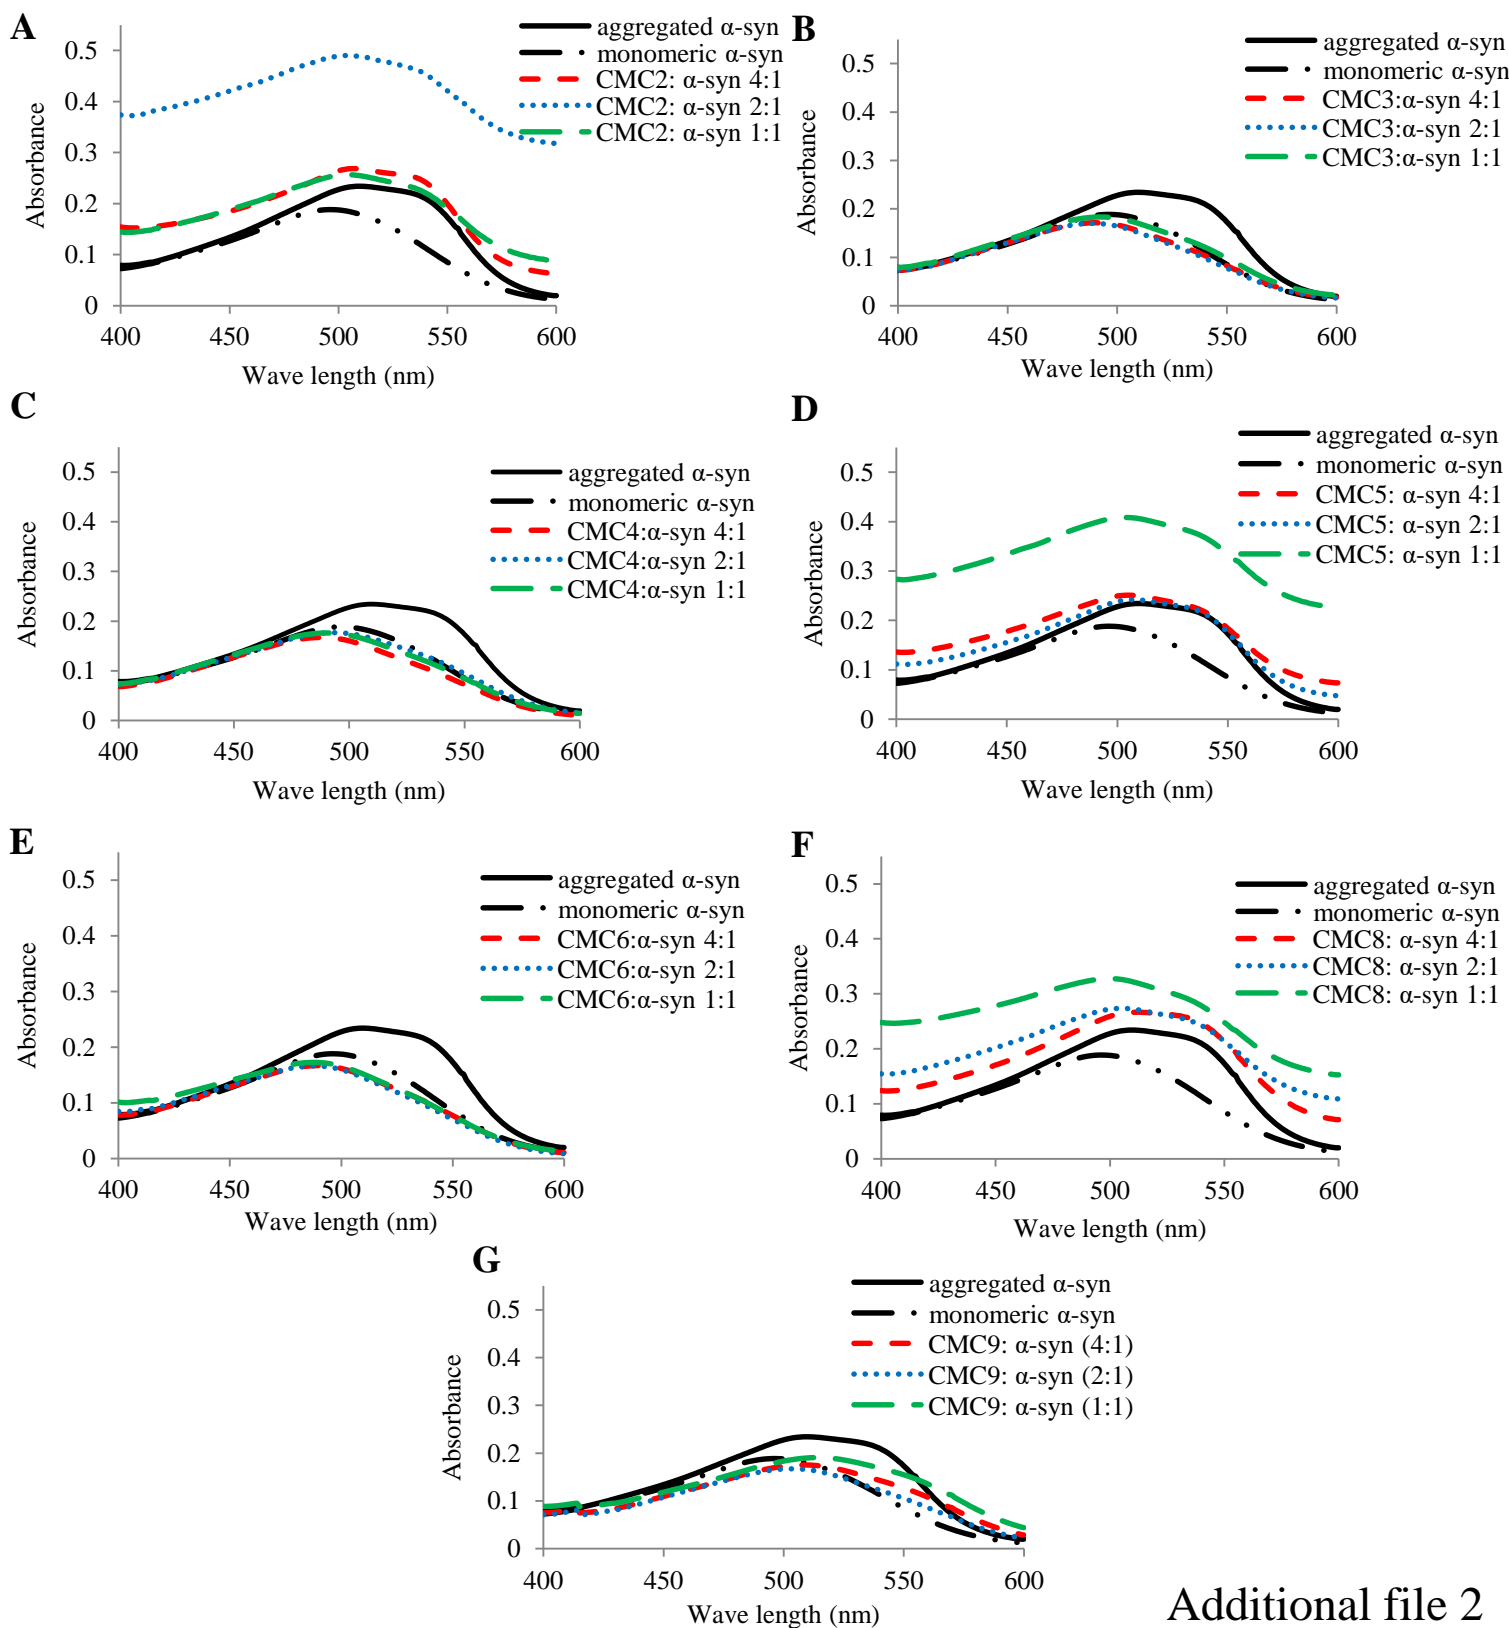

Supplement: 12906_2020_2849_MOESM2_ESM.pdf [file 12906_2020_2849_MOESM2_ESM.pdf]

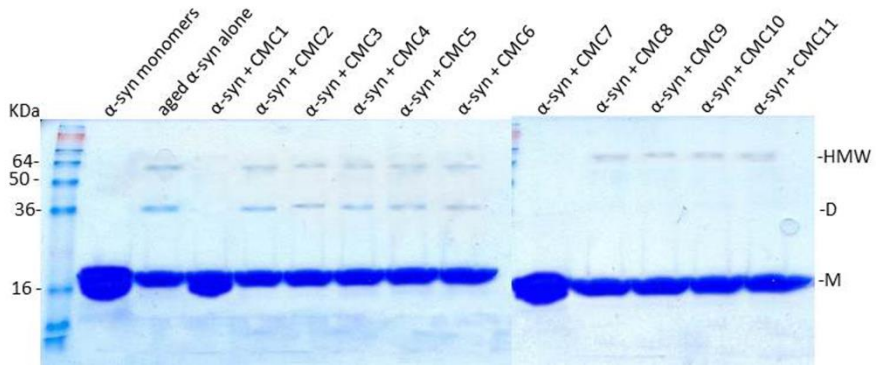

Additional file 3

Supplement: 12906_2020_2849_MOESM3_ESM.pdf [file 12906_2020_2849_MOESM3_ESM.pdf]

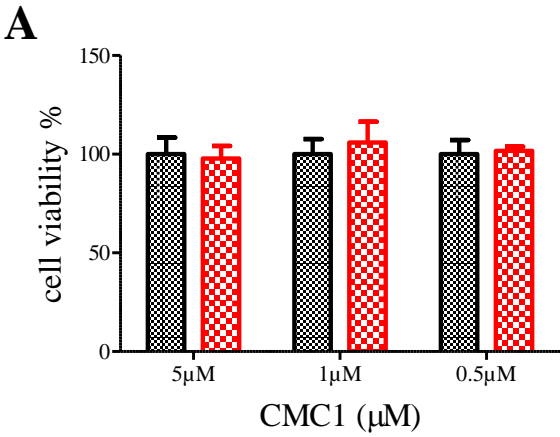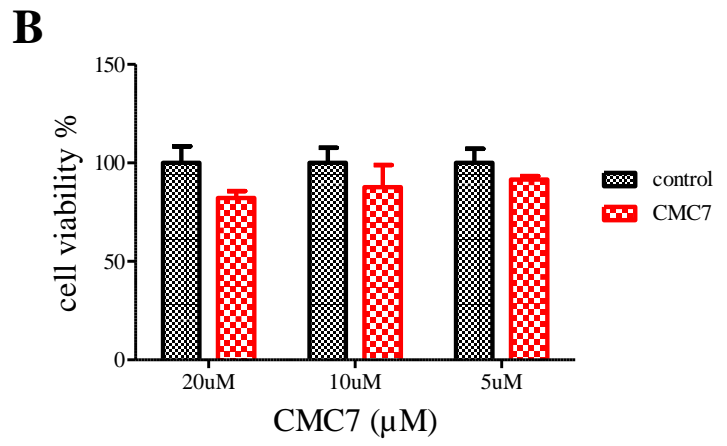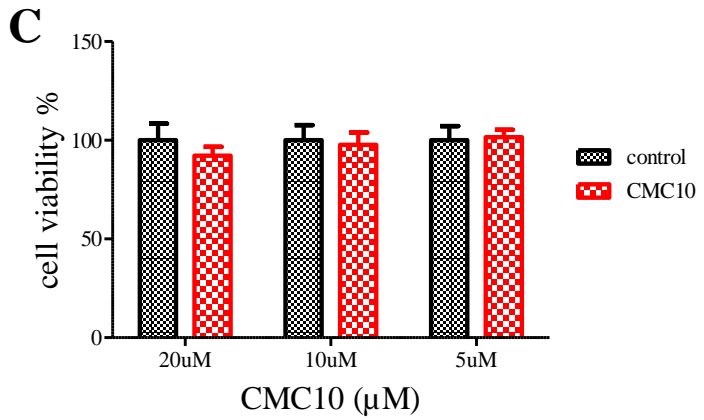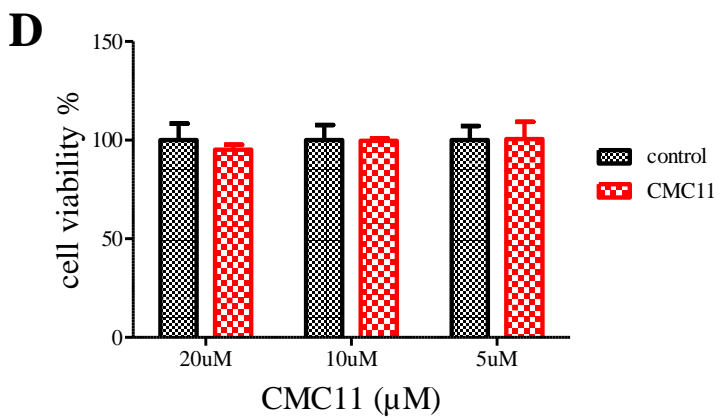

Supplement: 12906_2020_2849_MOESM4_ESM.pdf [file 12906_2020_2849_MOESM4_ESM.pdf]

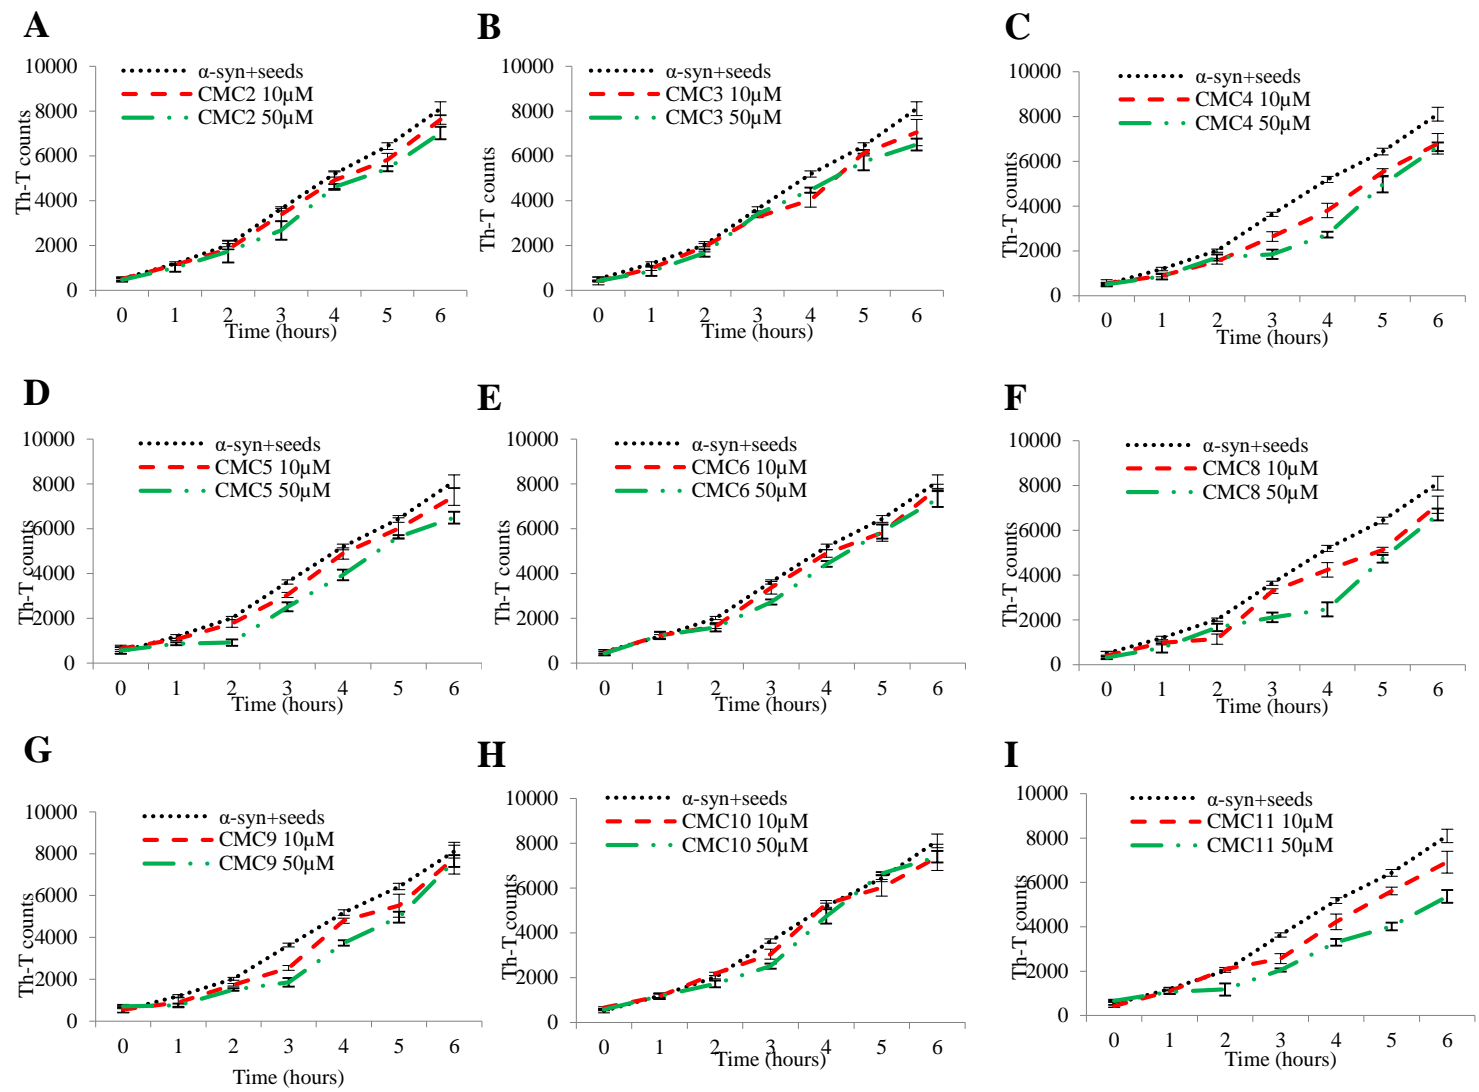

Additional file 5

Supplement: 12906_2020_2849_MOESM5_ESM.pdf [file 12906_2020_2849_MOESM5_ESM.pdf]

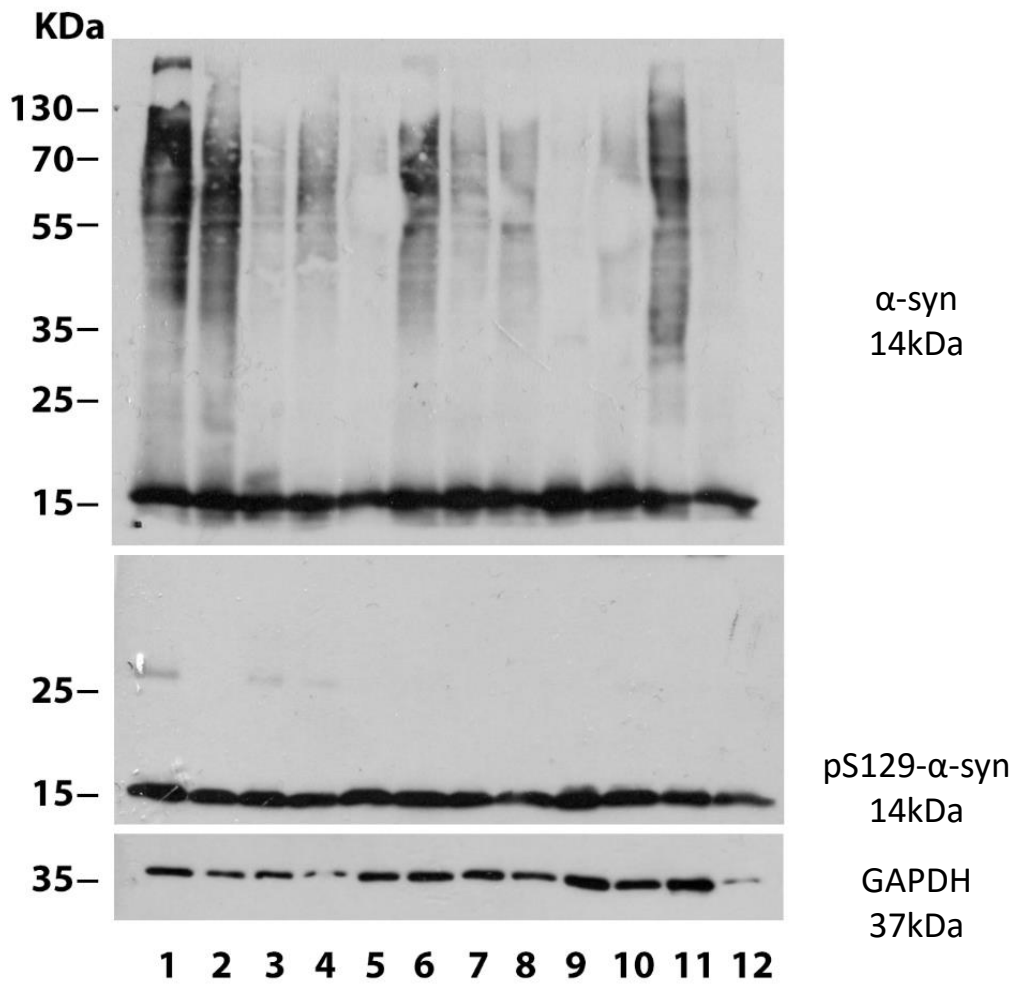

Additional file 6

Supplement: 12906_2020_2849_MOESM6_ESM.pdf [file 12906_2020_2849_MOESM6_ESM.pdf]

MTT assay M17 cells+fresh a-syn

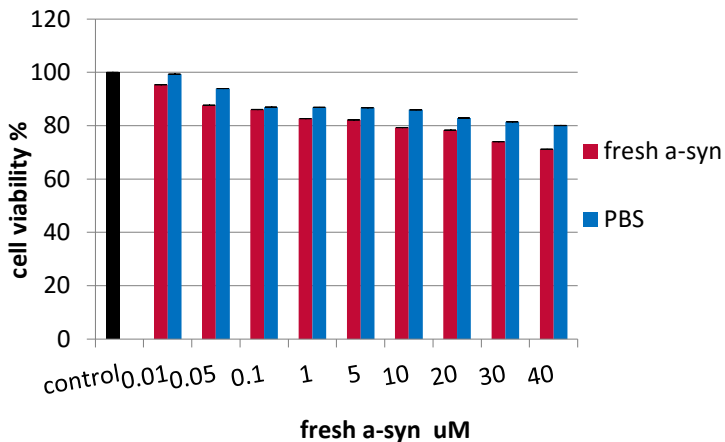

MTT assay M17 cells+aged a-syn

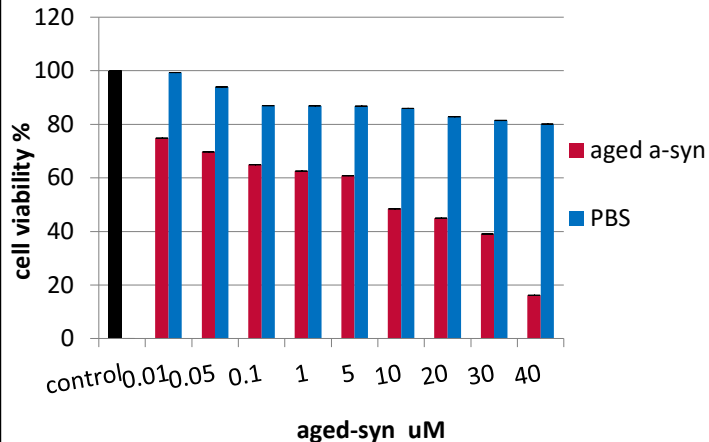

MTT assay M17 cells+CMC1

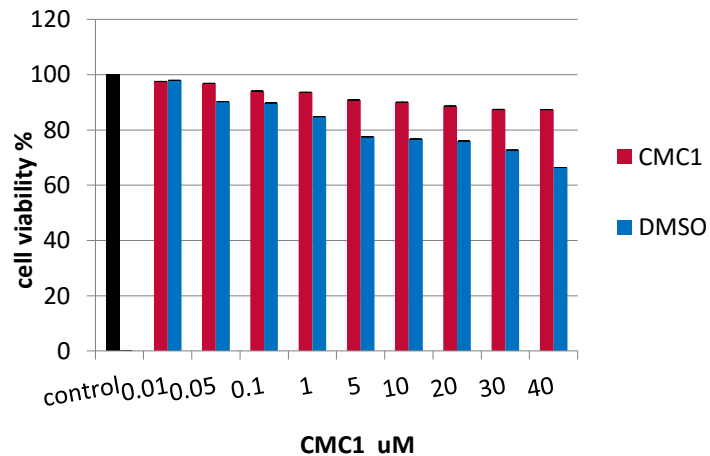

MTT assay M17 cells+CMC7

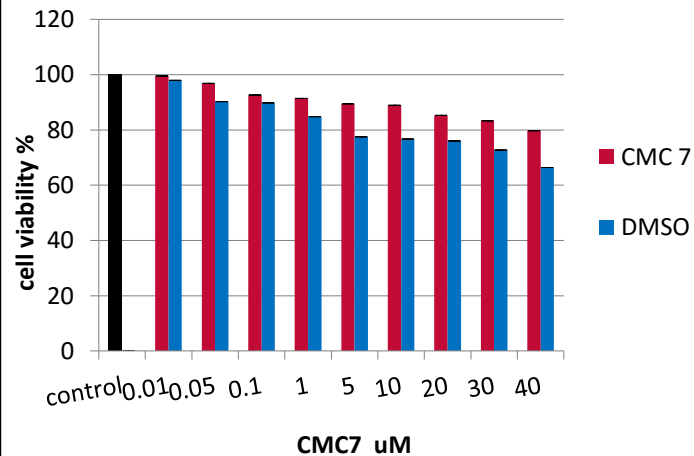

Supplement: 12906_2020_2849_MOESM7_ESM.pdf [file 12906_2020_2849_MOESM7_ESM.pdf]

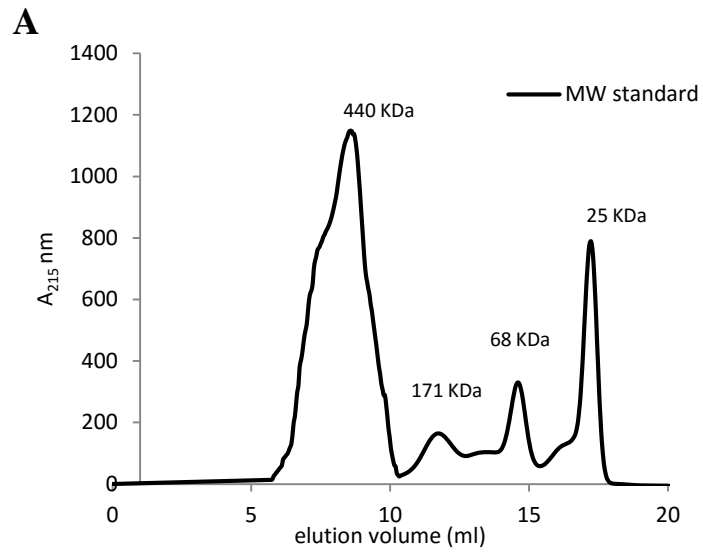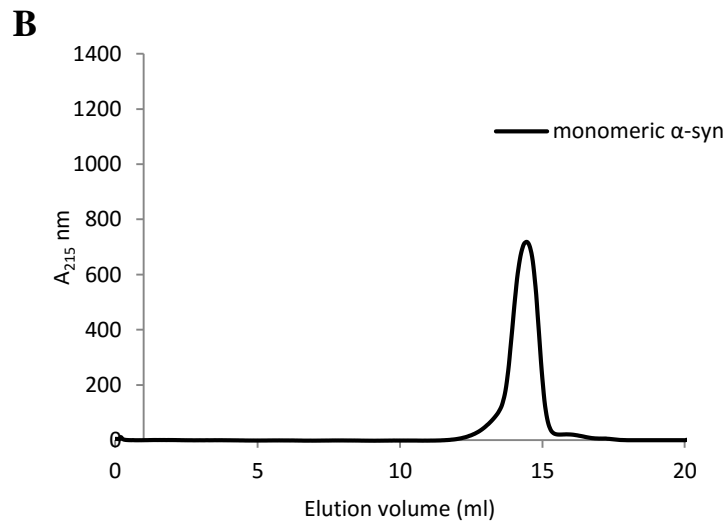

Supplement: 12906_2020_2849_MOESM8_ESM.pdf [file 12906_2020_2849_MOESM8_ESM.pdf]
